# Supplementary material for: Mitotic DNA synthesis in response to replication stress requires the sequential action of DNA polymerases zeta and delta in human cells
Source: Nat Commun. 2023 Feb 9;14:706. doi: 10.1038/s41467-023-35992-5 (PMC9911744; doi:10.1038/s41467-023-35992-5)
Supplement: Supplementary file 1 — Supplementary information [file 41467_2023_35992_MOESM1_ESM.pdf]

# **Supplementary Information**

**Mitotic DNA synthesis in response to replication stress requires the sequential  
action of DNA polymerases zeta and delta in human cells**

Wei Wu, Szymon A. Barwacz, Rahul Bhowmick, Katrine Lundgaard, Marisa M. Gonçalves  
Dinis, Malgorzata Clausen, Masato T. Kanemaki and Ying Liu

**Supplementary figures and legends 1 to 12**

**Supplementary Table 1 (Reagents table)**

**FACS gating strategy**

Supplementary Fig.1

A

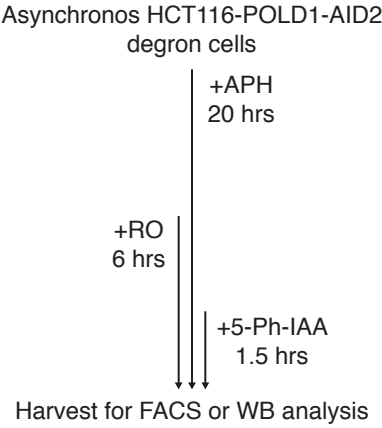

B

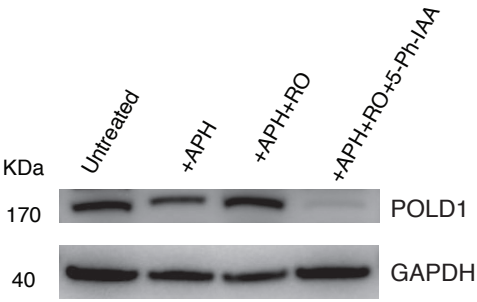

C

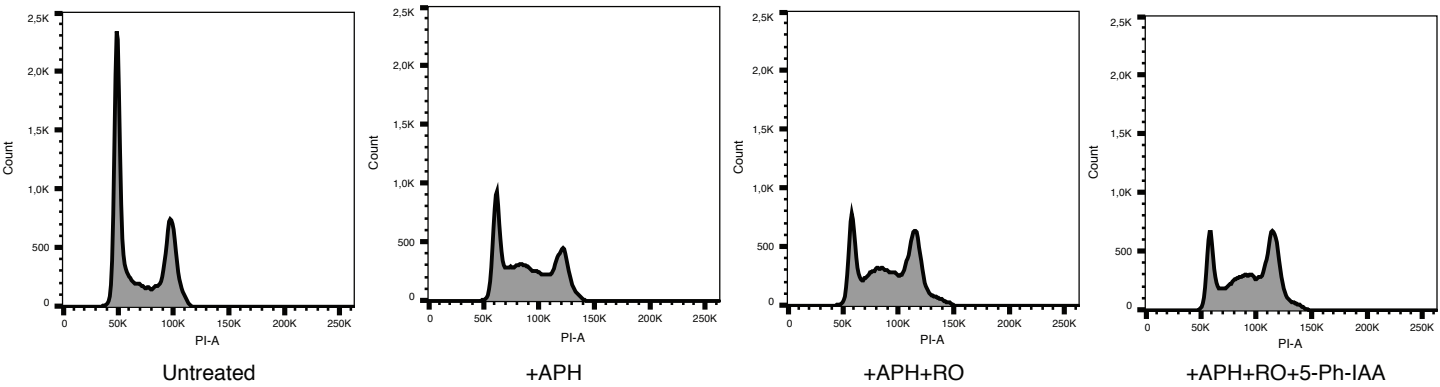

**Supplementary Fig. 1: HCT116-POLD1-AID2 cells were accumulated at G2 phase following RO3306 treatment.**

(A) Experimental workflow for cell synchronization and flow cytometry (FACS) or Western blot (WB) of analysis of HCT116-POLD1-AID2 cells following treatment with 5-Ph-IAA and RO3306 (RO). (B) Western blot analysis of POLD1 expression at the end of the treatment. GAPDH was used as a loading control. (C) Representative histogram of propidium iodide (PI) fluorescence of HCT116-POLD1-AID2 cells harvested at end of the treatment. Cells were fixed with 70% ethanol, stained with propidium iodide, and analyzed by flow cytometry. Untreated cells were used as a control. X-axis, total PI area; Y-axis, cell count.

# Supplementary Fig. 2

**a**

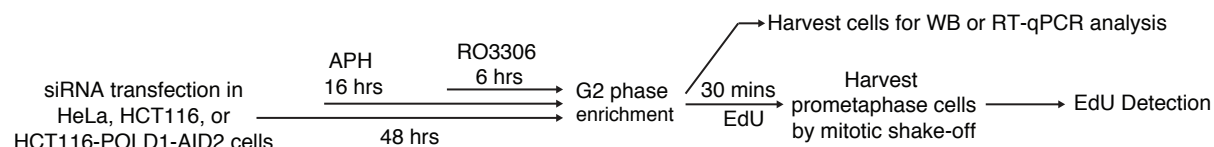

**b**

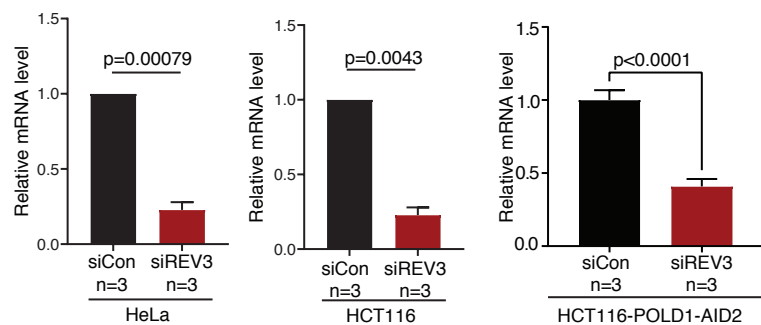

**d**

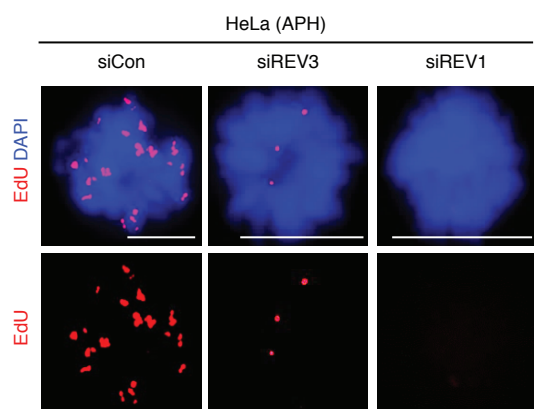

**f**

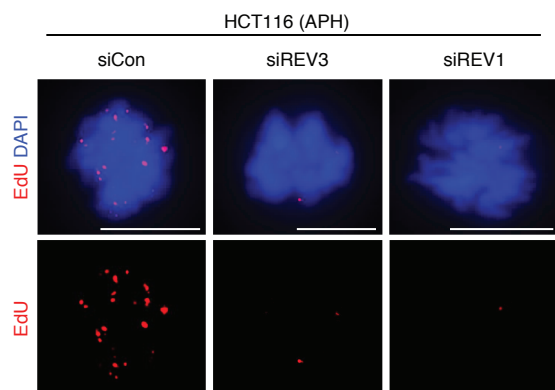

**h**

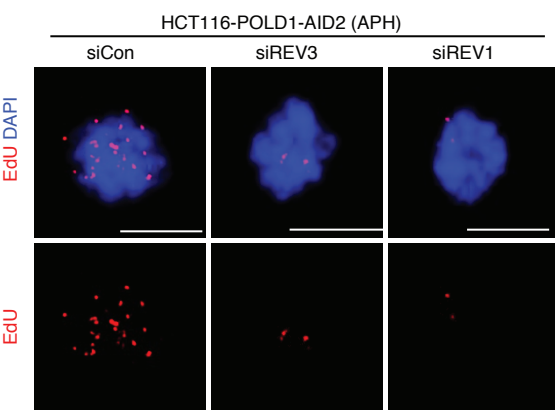

**c**

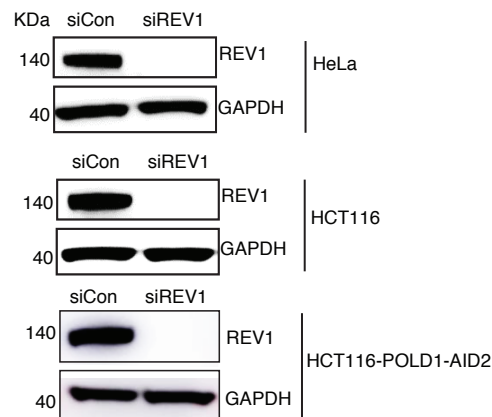

**e**

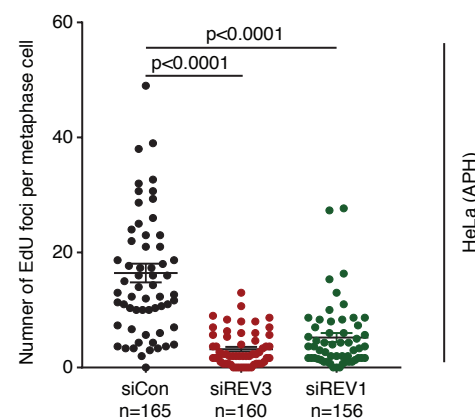

**g**

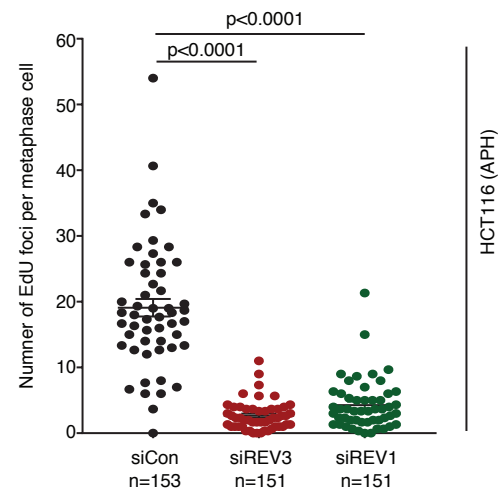

**i**

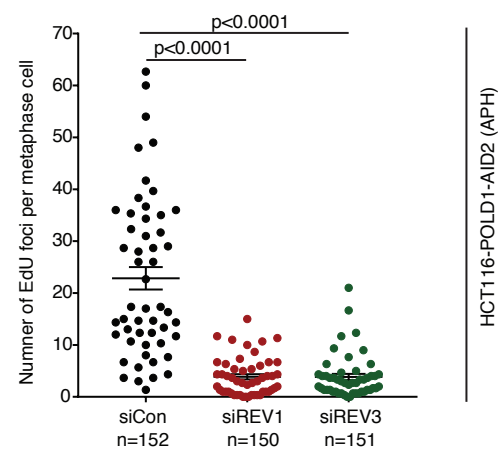

**Supplementary Fig. 2: REV3 and REV1 are essential for MiDAS in HeLa and HCT116 cells.**

**a** Experimental workflow of RT-qPCR and Western blotting analysis with HeLa, HCT116 or HCT116-POLD1-AID2 cells following REV3 or REV1 depletion and APH treatment (0.4  $\mu$ M). **b** Quantification of REV3 mRNA by RT-qPCR after transfecting the cells with control siRNA or REV3 siRNA. The RT-qPCR value was normalized against a region of the GAPDH gene for each sample. Data of each bar are means of independent experiments. Error bars represent SEM. P values were calculated using a two-tailed Student's t-test (n=3 biological replicates). **c** Western blot analysis of REV1 after transfecting cells with control siRNA or REV1 siRNA. GAPDH was used as a loading control. Representative images (**d**) and quantification (**e**) of MiDAS foci (labeled with EdU; red) in prometaphase HeLa cells treated as shown in panel a. Representative images (**f**) and quantification (**g**) of MiDAS foci (labeled with EdU; red) in prometaphase HCT116 cells treated as shown in panel a. Representative images (**h**) and quantification (**i**) of MiDAS foci (labeled with EdU; red) in prometaphase HCT116-POLD2-AID2 cells treated as shown in panel a. DNA was stained with DAPI (blue). Each data point in charts of e, g, i is means of three independent experiments and plotted with Prism (n= number of cells analyzed in each condition in three experiments). Error bars represent SEM. P values were calculated using a two-tailed non-parametric Mann–Whitney test. Scale bars, 10  $\mu$ m. Hr, hour; min, minute.

Supplementary Fig. 3

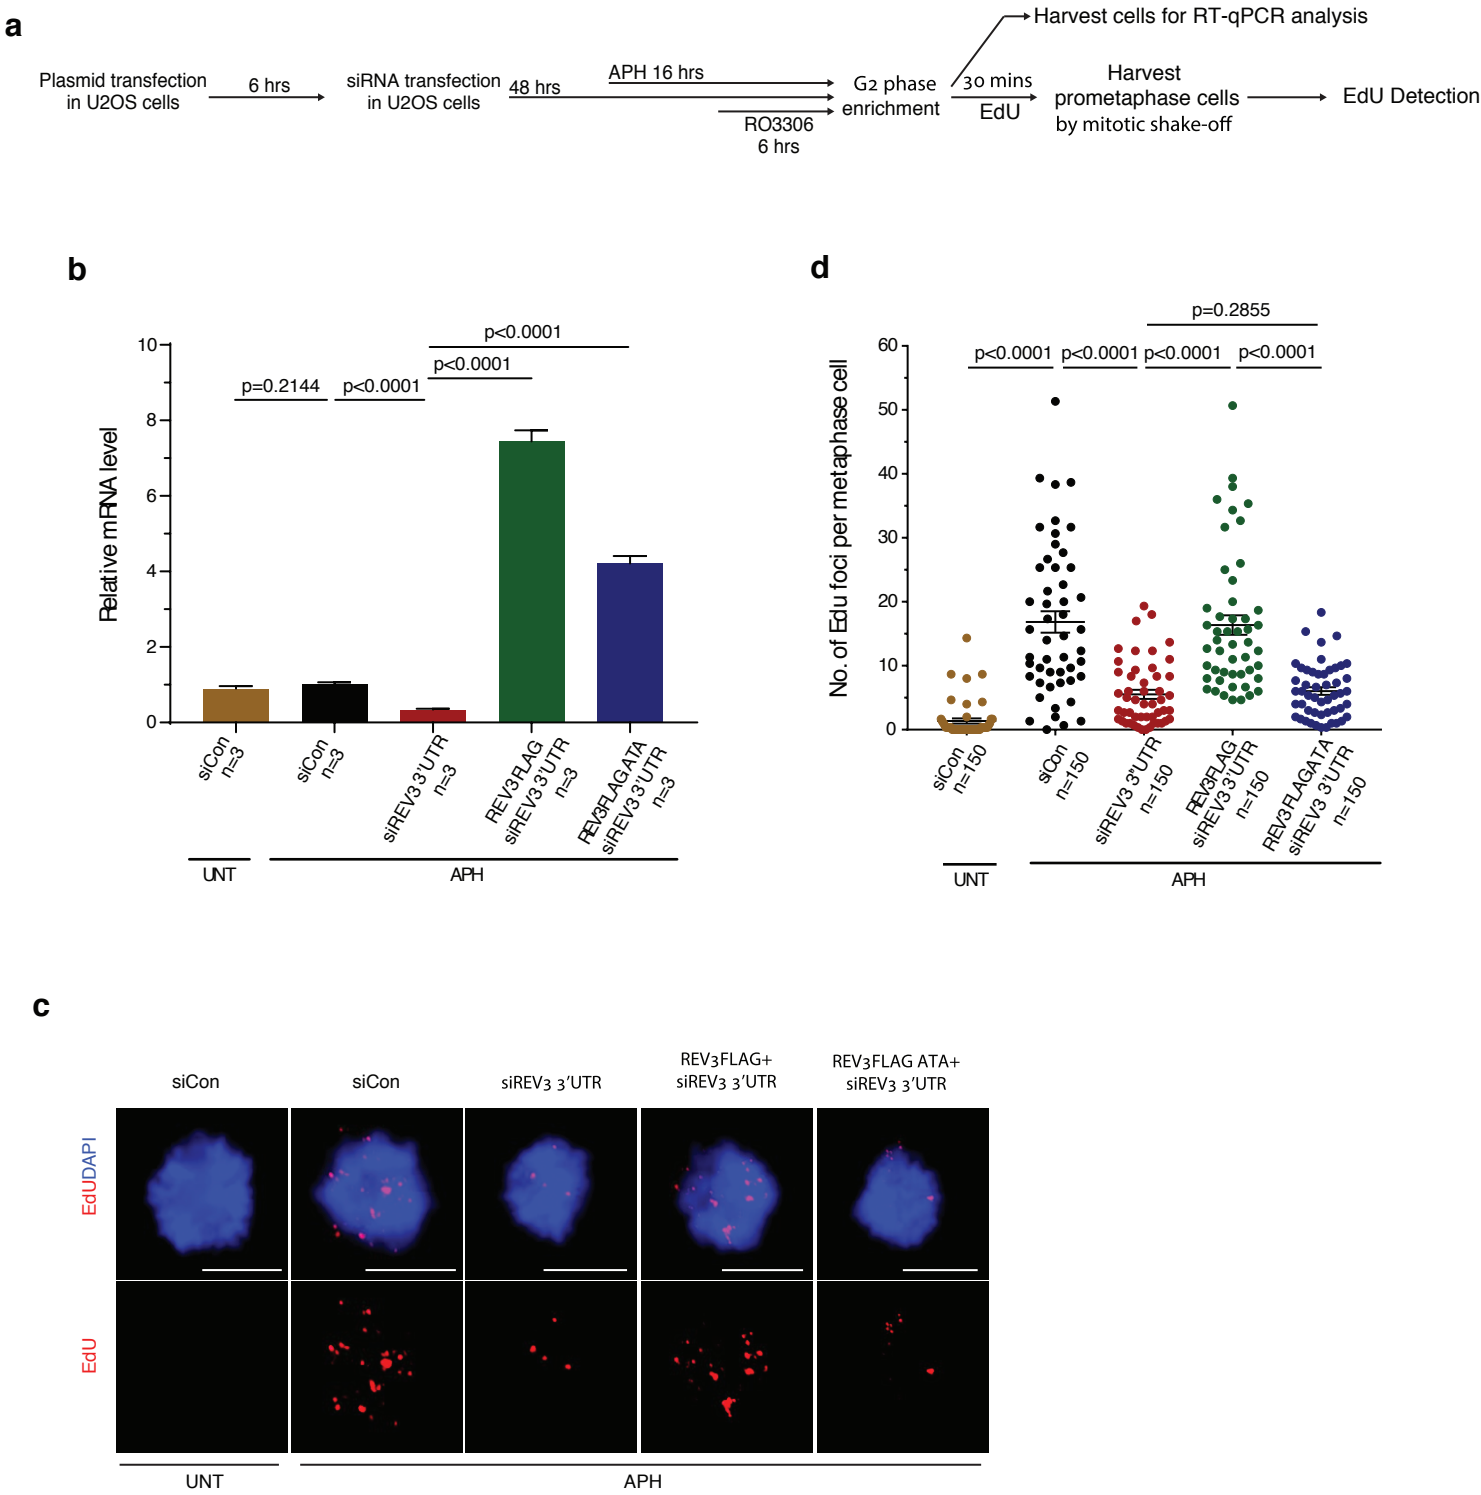

**Supplementary Fig. 3: The catalytic domain of REV3 plays a role in MiDAS.**

**a** Experimental workflow for MiDAS analysis in U2OS cell transfected with a REV3-FLAG or a REV3-FLAGATA mutant plasmid, and then treated with control or an siRNA targeting the 3' UTR of REV3 and APH (0.4  $\mu$ M). Following 6 hours RO3306 treatment, cells were rinsed three times with pre-warmed, drug-free culture medium within 5 minutes, and then incubated with fresh media with EdU for 30 minutes before MiDAS analysis. **b** Quantification of REV3 mRNA using RT-qPCR. The RT-qPCR value was normalized against a region of the GAPDH gene for each sample. Data of each bar are means of three independent experiments. Error bars represent SEM. P values were calculated using a two-tailed Student's t-test (n=3 biological replicates). Representative images (**c**) and quantification (**d**) of MiDAS (labelled with EdU; red). Each data point in chart d is mean of three independent experiments and plotted with Prism (n= number of cells analyzed in each condition in three experiments). Error bars represent SEM. P values were calculated using a two-tailed non-parametric Mann–Whitney test. Scale bars, 10  $\mu$ m. Hr, hour; min, minute.

## Supplementary Fig. 4

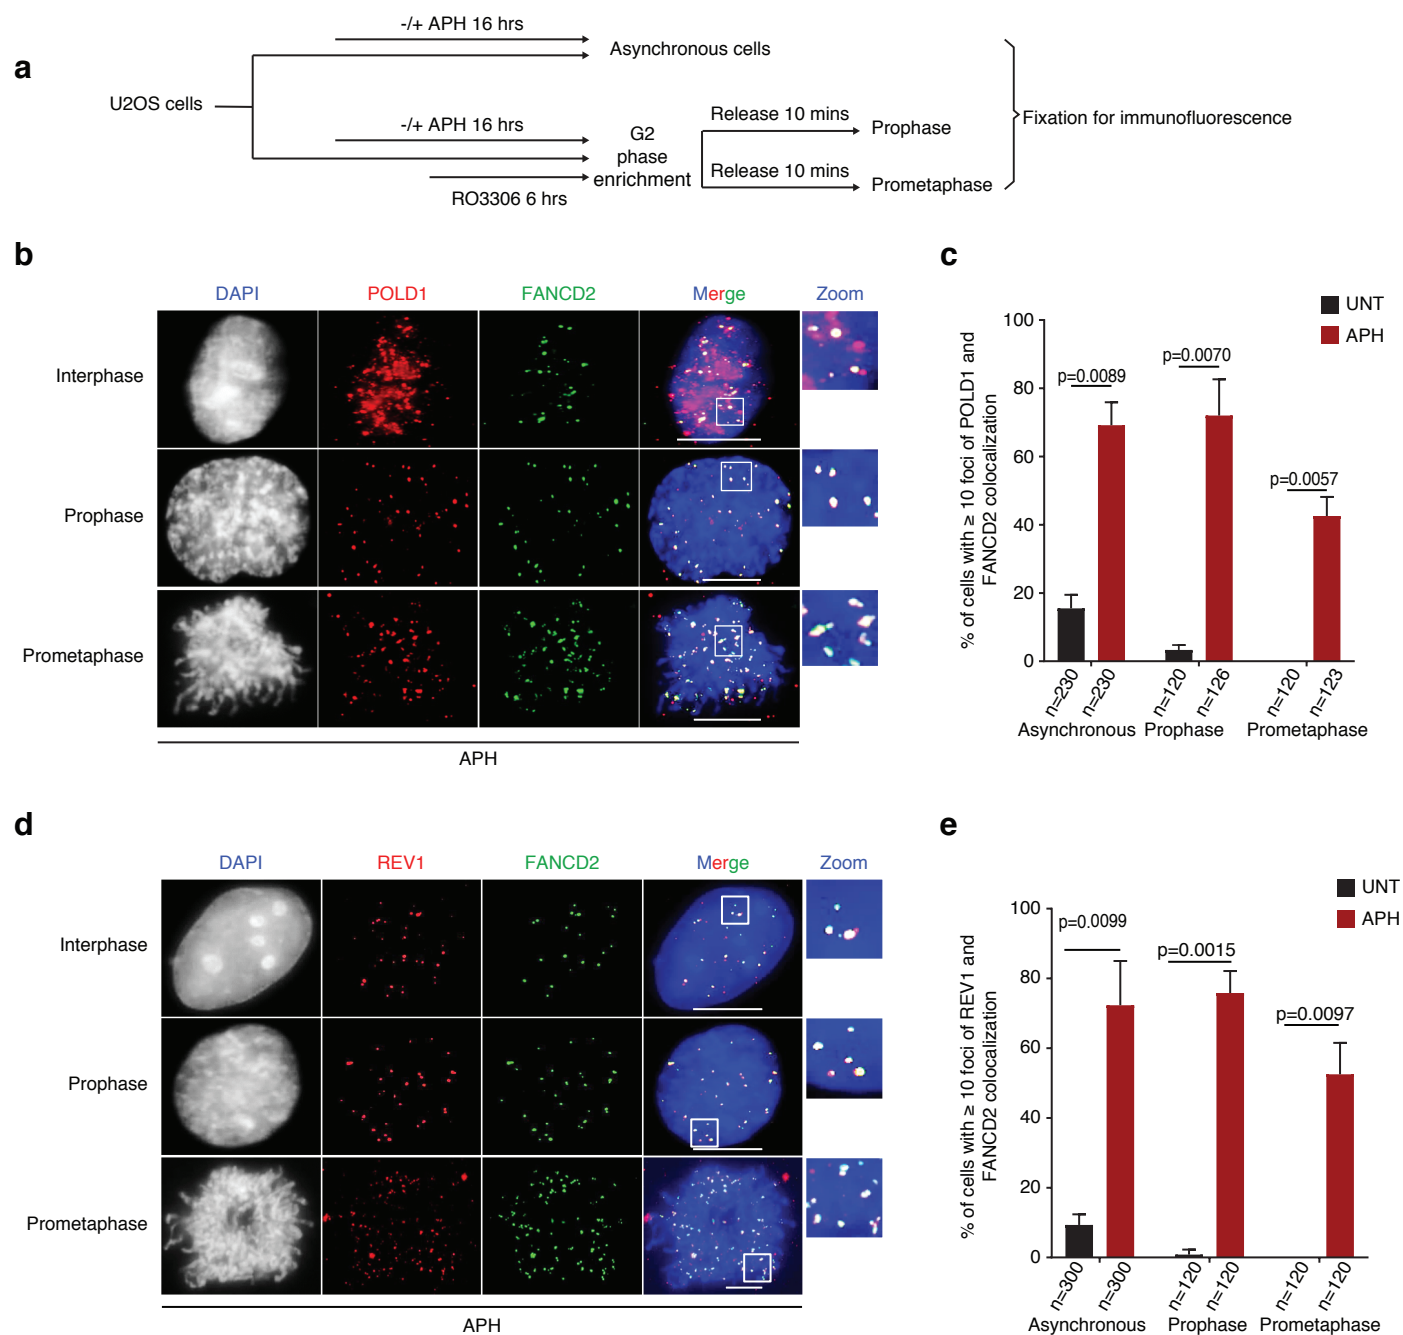

**Supplementary Fig. 4: POLD1 co-localizes with REV1 and FANCD2 in mitosis when cells are challenged with RS.**

**a** Experimental workflow for U2OS cell synchronization at prophase or prometaphase under untreated or APH treatment (0.4  $\mu$ M) conditions. **b** Representative immunofluorescence images of interphase, prophase and prometaphase cells treated with APH (0.4  $\mu$ M) for 16 hours and stained with POLD1 antibody (red) and FANCD2 antibody (green). DNA was stained with DAPI (blue). A zoomed image from the cell indicated by a white box is shown on the right. **c** Quantification of the co-localization of POLD1 foci with FANCD2 foci in cells treated as shown in panel a. **d** Representative immunofluorescence images of interphase, prophase and prometaphase cells stained with REV1 antibody (red) and FANCD2 antibody (green). DNA was stained with DAPI (blue). A zoomed image from the cell indicated by a white box is shown on the right. **e** Quantification of the co-localization of REV1 foci with FANCD2 foci in cells treated as shown in panel a. Data in charts c and e are means of three independent experiments and plotted with Prism (n= number of cells analyzed in each condition in three experiments). Error bars represent SEM. P values were calculated using a two-tailed Student's t-test. Scale bars, 10  $\mu$ m. Hr, hour; min, minute.

**Supplementary Fig. 5**

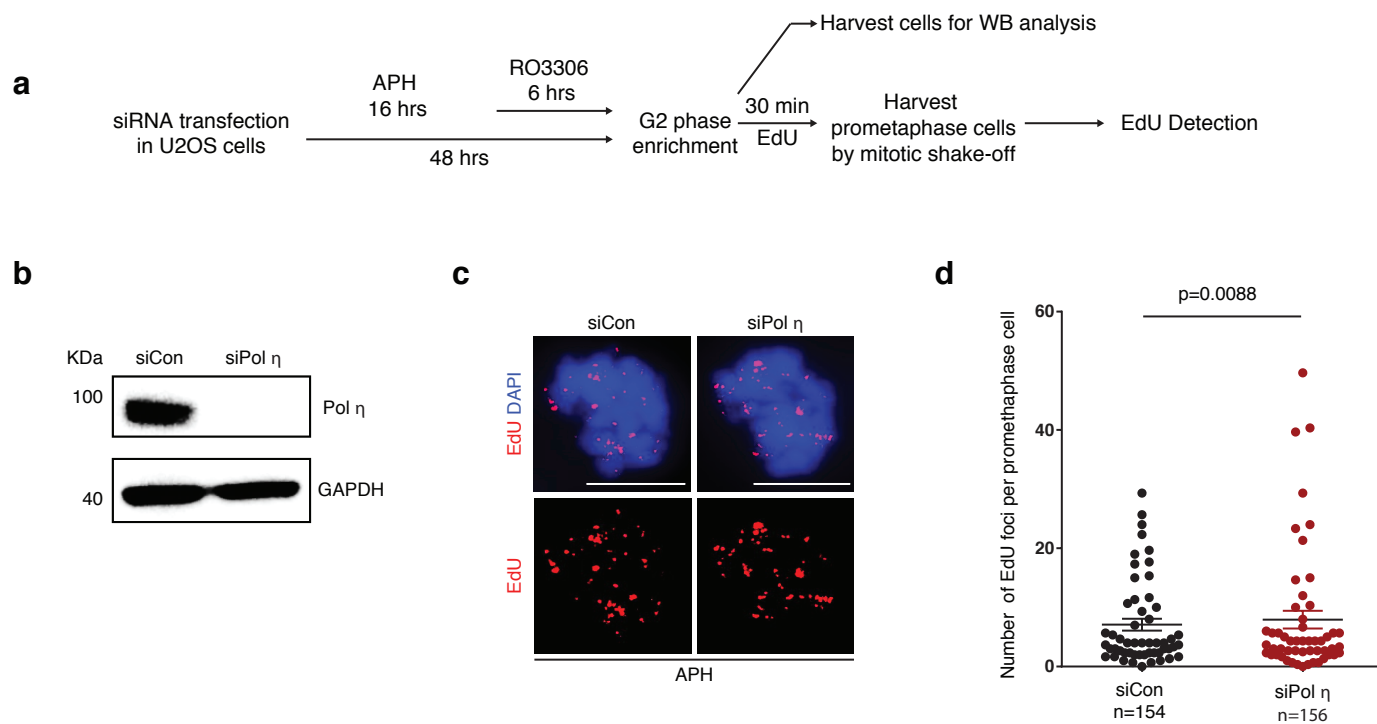

**Supplementary Fig. 5: Pol  $\eta$  is not required for MiDAS.**

**a** Experimental workflow for analysis of MiDAS in prometaphase U2OS cells following Pol  $\eta$  depletion and APH treatment (0.4  $\mu$ M). Following 6 hours RO3306 treatment, cells were rinsed three times with pre-warmed, drug-free culture medium within 5 minutes, and then incubated with fresh media with EdU for 30 minutes before MiDAS analysis. **b** Western blot (WB) analysis of Pol  $\eta$  after transfecting cells with control or Pol  $\eta$  siRNAs. GAPDH was a loading control. Representative images (**c**) and quantification (**d**) of MiDAS foci (labeled with EdU; red) in prometaphase cells treated as shown in panel a. DNA was stained with DAPI (blue). Each data point in chart d is mean of three independent experiments and plotted with Prism (n= number of cells analyzed in each condition in three experiments). Error bars represent SEM. P values were calculated using a two-tailed non-parametric Mann–Whitney test. Scale bars, 10  $\mu$ m. Hr, hour; min, minute.

Supplementary Fig. 6

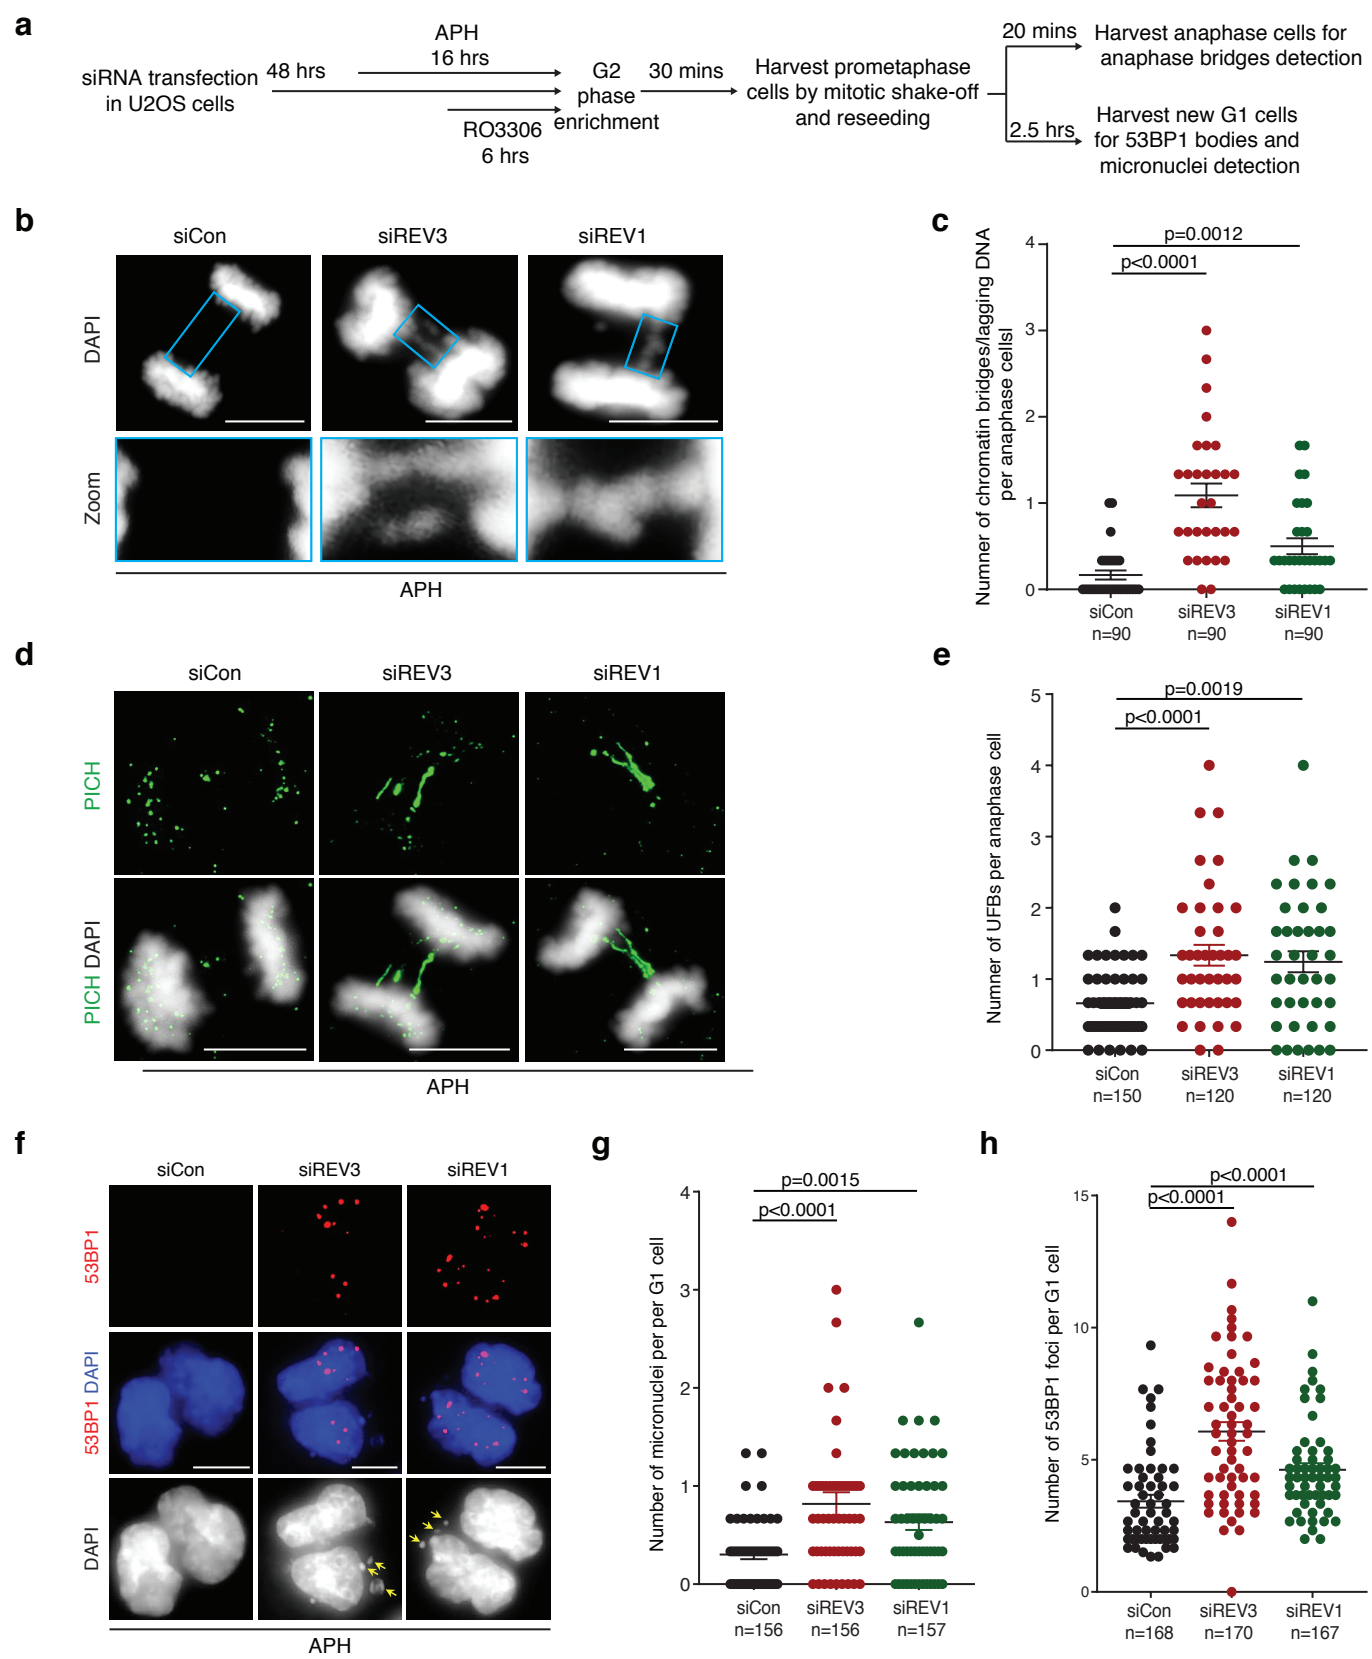

**Supplementary Fig. 6: REV3 and REV1 are essential for genome stability.**

**a** Experimental workflow for analyzing U2OS cells in metaphase, anaphase or in the next G1 phase following REV1 or REV3 depletion and APH treatment (0.4  $\mu$ M). Following 6 hours RO3306 treatment, cells were rinsed three times with pre-warmed, drug-free culture medium within 5 minutes, and then incubated with fresh media for the follow-up steps. Representative images (**b**) and quantification (**c**) of DAPI-positive bridges or lagging chromatin in U2OS cells during anaphase following the treatment indicated in panel a. DNA was stained with DAPI. Areas marked by blue boxes are zoomed in the lower panel of b. Representative immunofluorescence images (**d**) and quantification (**e**) of UFBs (marked by PICH; green) in U2OS cells during anaphase following the treatment indicated in panel a. DNA was stained with DAPI. Representative immunofluorescence images (**f**) and quantification of micronuclei (yellow arrows) (**g**) or 53BP1 bodies (red) (**h**) in newly born U2OS G1 cells following the treatment shown in panel a. DNA was stained with DAPI. Each data point in charts c, e, g, and h is means of three independent experiments and plotted with Prism (n= number of cells analyzed in each condition in three experiments). Error bars represent SEM. P values were calculated using a two-tailed non-parametric Mann–Whitney test. Scale bars, 10  $\mu$ m. Hr, hour; min, minute.

Supplementary Fig. 7

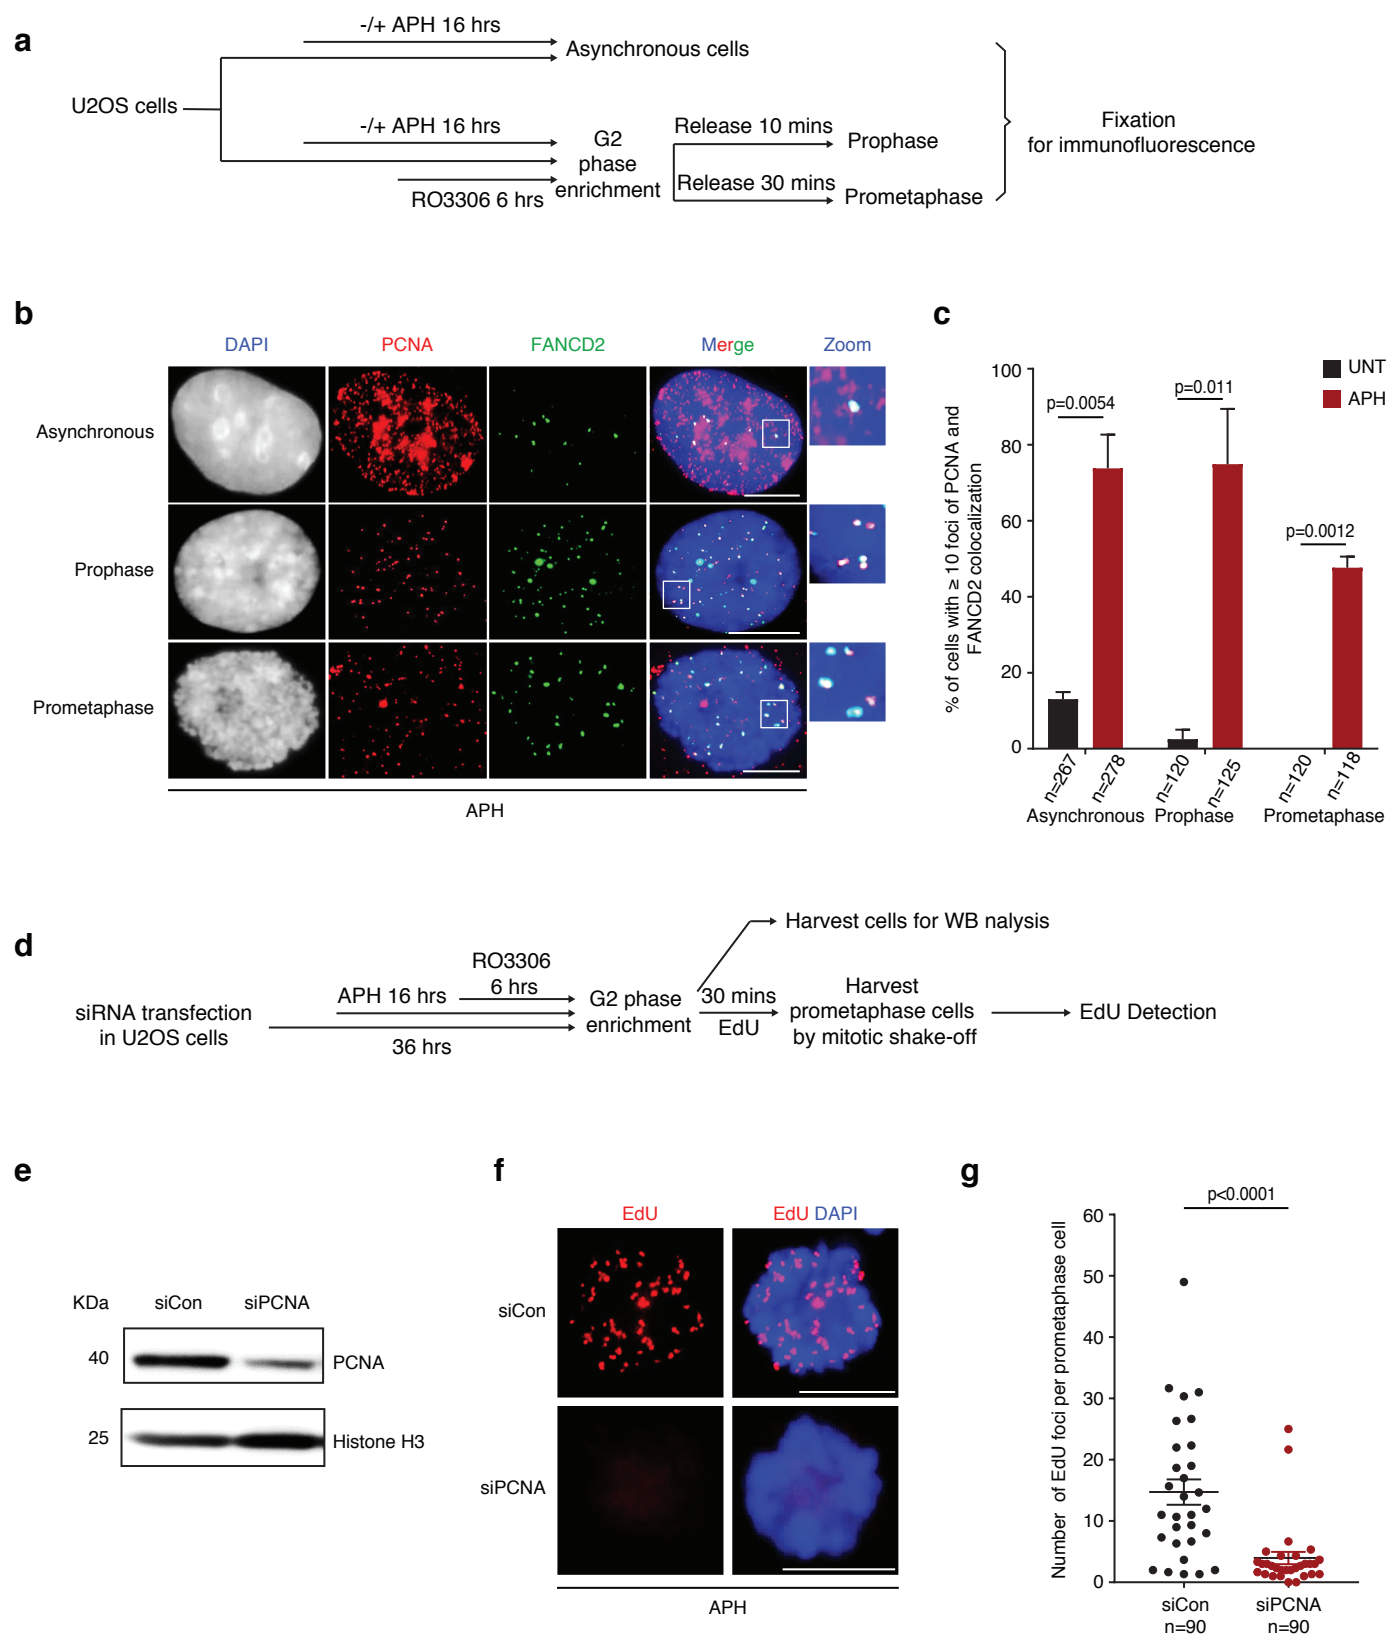

**Supplementary Fig. 7: PCNA is required for MiDAS.**

**a** Experimental workflow for immunofluorescence analysis (IF) of prophase or prometaphase cells following APH treatment (0.4  $\mu$ M) treatment. Following 6 hours RO3306 treatment, cells were rinsed three times with pre-warmed, drug-free culture medium within 5 minutes, and then incubated with fresh media for the follow-up steps. **b** Representative immunofluorescence images of interphase, prophase and prometaphase cells treated with APH (0.4  $\mu$ M) for 16 hours and stained with a PCNA antibody (red) or a FANCD2 antibody (green). DNA was stained with DAPI (blue). A zoomed image from the cell indicated by a white box is shown on the right. **c** Quantification of the co-localization of PCNA foci with FANCD2 foci in cells treated as shown in panel a. Data in chart are means of independent experiments (n= 3 biological replicates). Error bars represent SEM. P values were calculated using a two-tailed Student's t-test. **d** Experimental workflow for analysis of MiDAS in prometaphase cells following PCNA depletion and APH treatment (0.4  $\mu$ M). Following 6 hours RO3306 treatment, cells were rinsed three times with pre-warmed, drug-free culture medium within 5 minutes, and then incubated with fresh media with EdU for 30 minutes before MiDAS analysis. **e** Western blot analysis of PCNA after transfecting cells with control PCNA siRNAs. Histone H3 was used as a loading control. Representative images (**f**) and quantification (**g**) of MiDAS foci (labeled with EdU; red) in prometaphase cells treated as shown in panel d. DNA was stained with DAPI (blue). Each data point in chart g is means of three independent experiments and plotted with Prism (n= number of cells analyzed in each condition in three experiments). Error bars represent SEM. P values were calculated using a two-tailed non-parametric Mann–Whitney test. Scale bars, 10  $\mu$ m. Hr, hour; min, minute.

Supplementary Fig. 8

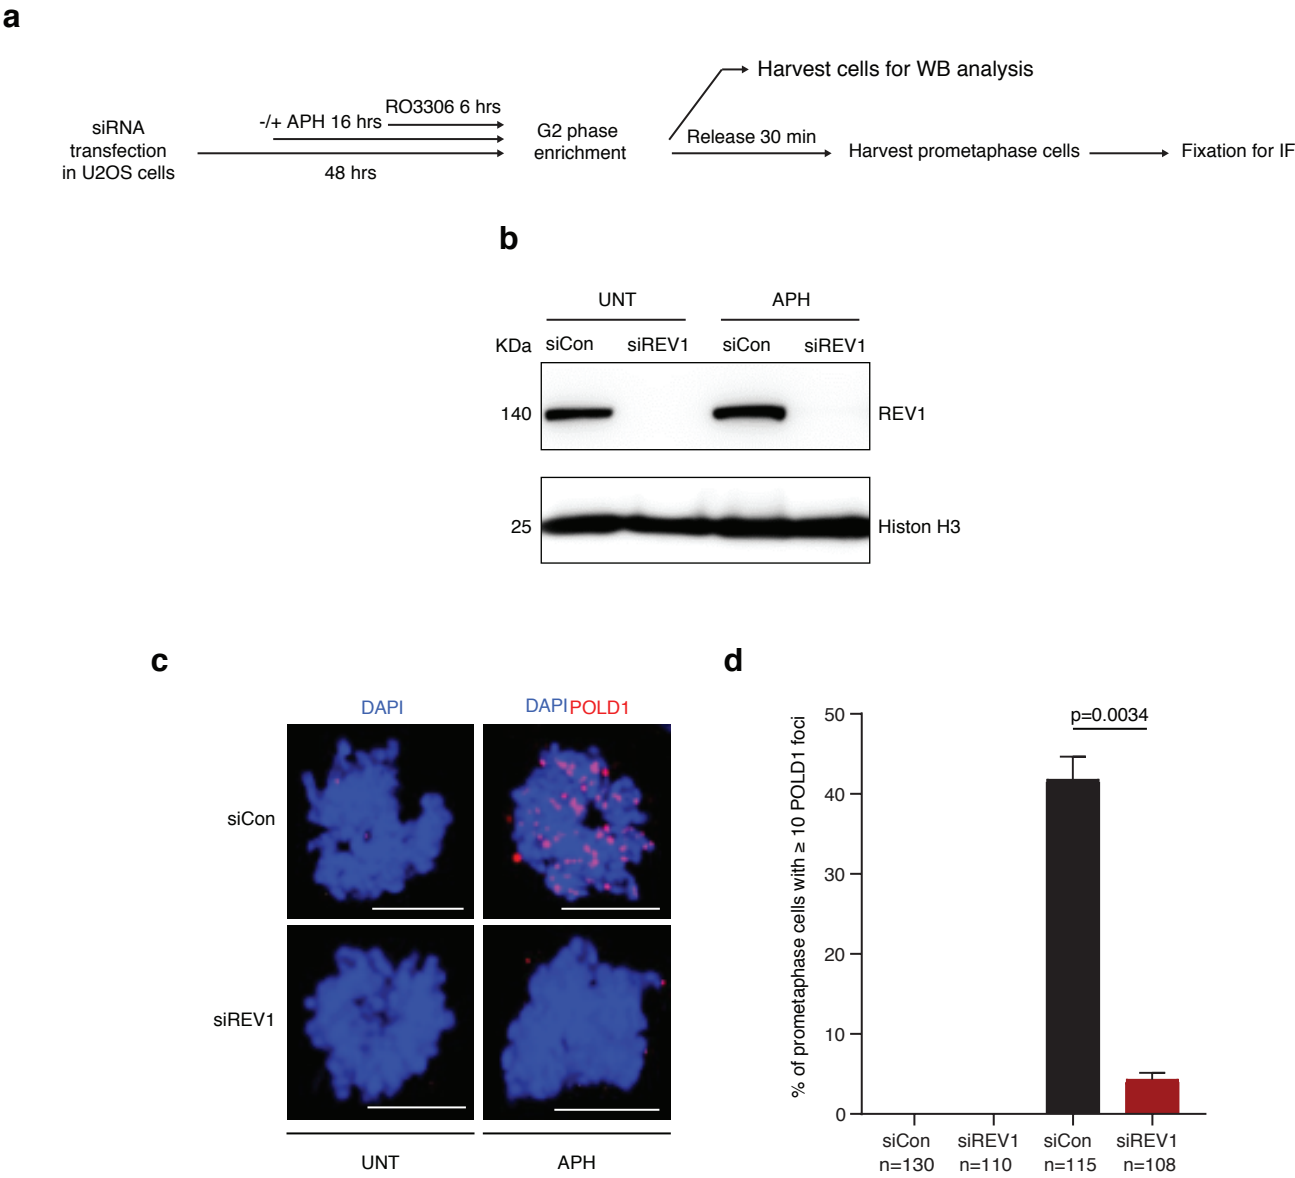

**Supplementary Fig. 8. POLD1 recruitment in mitosis depends on REV1 when cells are challenged with RS.**

**a** Experimental workflow for U2OS cells treated with siRNAs and then APH treatment (0.4  $\mu$ M) for immunofluorescence (IF) analysis. Following 6 hours RO3306 treatment, cells were rinsed three times with pre-warmed, drug-free culture medium within 5 minutes, and then incubated with fresh media for 30 minutes followed by fixation and IF analysis. **b** Western blot (WB) analysis of REV1. Histone H3 was used as loading control. Representative IF images (**c**) and quantification (**d**) of POLD1 foci (red) in untreated or APH-treated prometaphase U2OS cells. DNA was stained with DAPI (blue). Data in chart **d** are means of three independent experiments and plotted with Prism (n= number of cells analyzed in each condition in three experiments). Error bars represent SEM. P values were calculated using a two-tailed Student's t-test. Scale bars, 10  $\mu$ m. Hr, hour; min, minute.

Supplementary Fig. 9

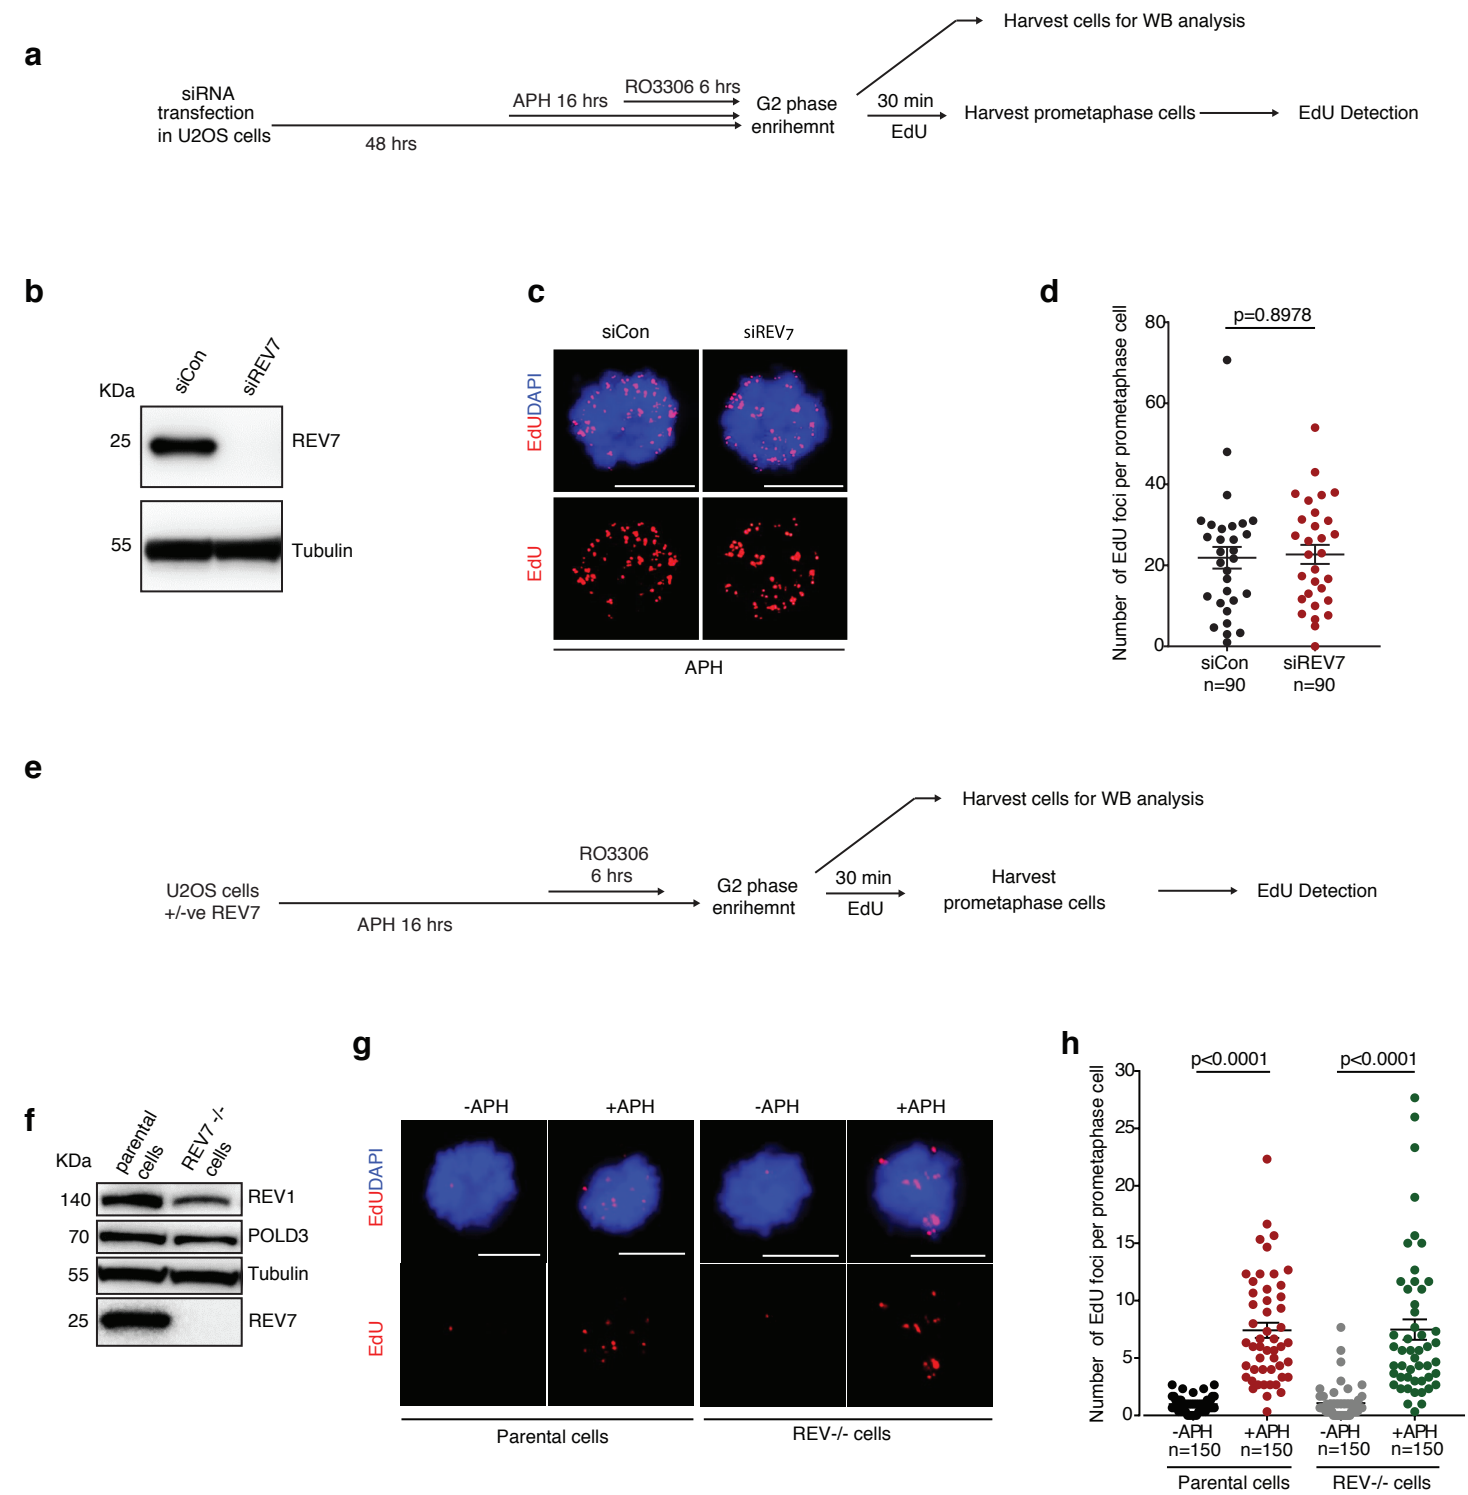

**Supplementary Fig. 9: Loss of REV7 does not affect MiDAS.**

**a** Experimental workflow for MiDAS analysis of U2OS cells following REV7 siRNA treatment and APH treatment (0.4  $\mu$ M). Following 6 hours RO3306 treatment, cells were rinsed three times with pre-warmed, drug-free culture medium within 5 minutes, and then incubated with fresh media for 30 minutes followed by fixation and IF analysis. **b** Western blot analysis of REV7.  $\beta$ -tubulin was used as a loading control. Representative immunofluorescence images (**c**) and quantification (**d**) of MiDAS foci (labeled with EdU; red) in prometaphase cells. **e** Experimental workflow for MiDAS analysis in parental and REV7<sup>-/-</sup> U2OS cells following APH treatment (0.4  $\mu$ M). Following 6 hours RO3306 treatment, cells were rinsed three times with pre-warmed, drug-free culture medium within 5 minutes, and then incubated with fresh media for 30 minutes followed by fixation and IF analysis. **f** Western blot analysis of REV7.  $\beta$ -tubulin was used as a loading control. The expression of REV1 and POLD3 were also examined in this assay. Representative immunofluorescence images (**g**) and quantification (**h**) of MiDAS foci (labeled with EdU; red) in prometaphase cells. DNA was stained with DAPI (blue). Each data point in charts d and h is means of three independent experiments and plotted with Prism (n= number of cells analyzed in each condition in three experiments). Error bars represent SEM. P values were calculated using a two-tailed non-parametric Mann–Whitney test. Scale bars, 10  $\mu$ m. Hr, hour; min, minute.

**Supplementary Fig. 10**

**a**

U2OS Flp-In T-Rex cell  $\xrightarrow{\text{pCDNA5\_FRT-TO\_HA-BirA}^*\text{-POLD3 (F}_{236}\text{F}_{239}/\text{A}_{236}\text{A}_{239}) + \text{pOG44 transfection}}$  Hygromycin selection  $\longrightarrow$  WB to confirm positive clones

**b**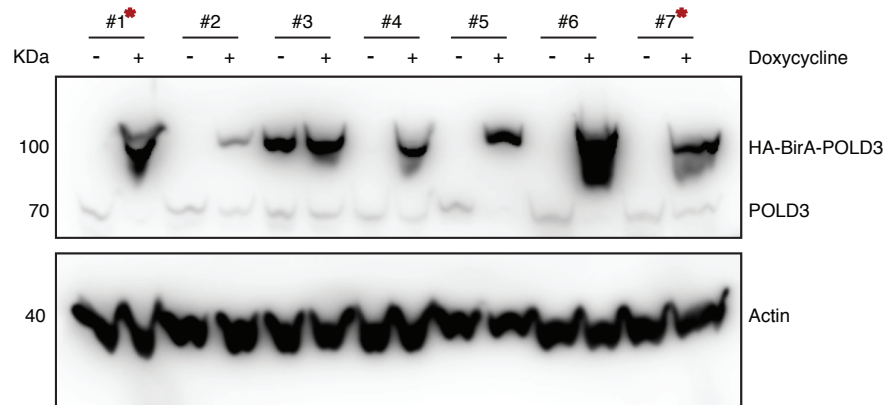

**Supplementary Fig. 10: Establishment of U2OS cell clones with doxycycline inducible expression of wild type or mutant BirA-POLD3 cell lines.**

**a** Workflow for the establishment of doxycycline inducible WT or mutant BirA-POLD3 (F<sub>238</sub>F<sub>239</sub>A<sub>238</sub>A<sub>239</sub>) (FF/AA) clones from U2OS Flp-In T-Rex parental cells. **b** Western blot analysis of BirA-POLD3 expression upon doxycycline induction in cell clones 1-7. Actin was used as a loading control. Red stars indicate the clones analyzed in the follow-up assays.

Supplementary Fig. 11

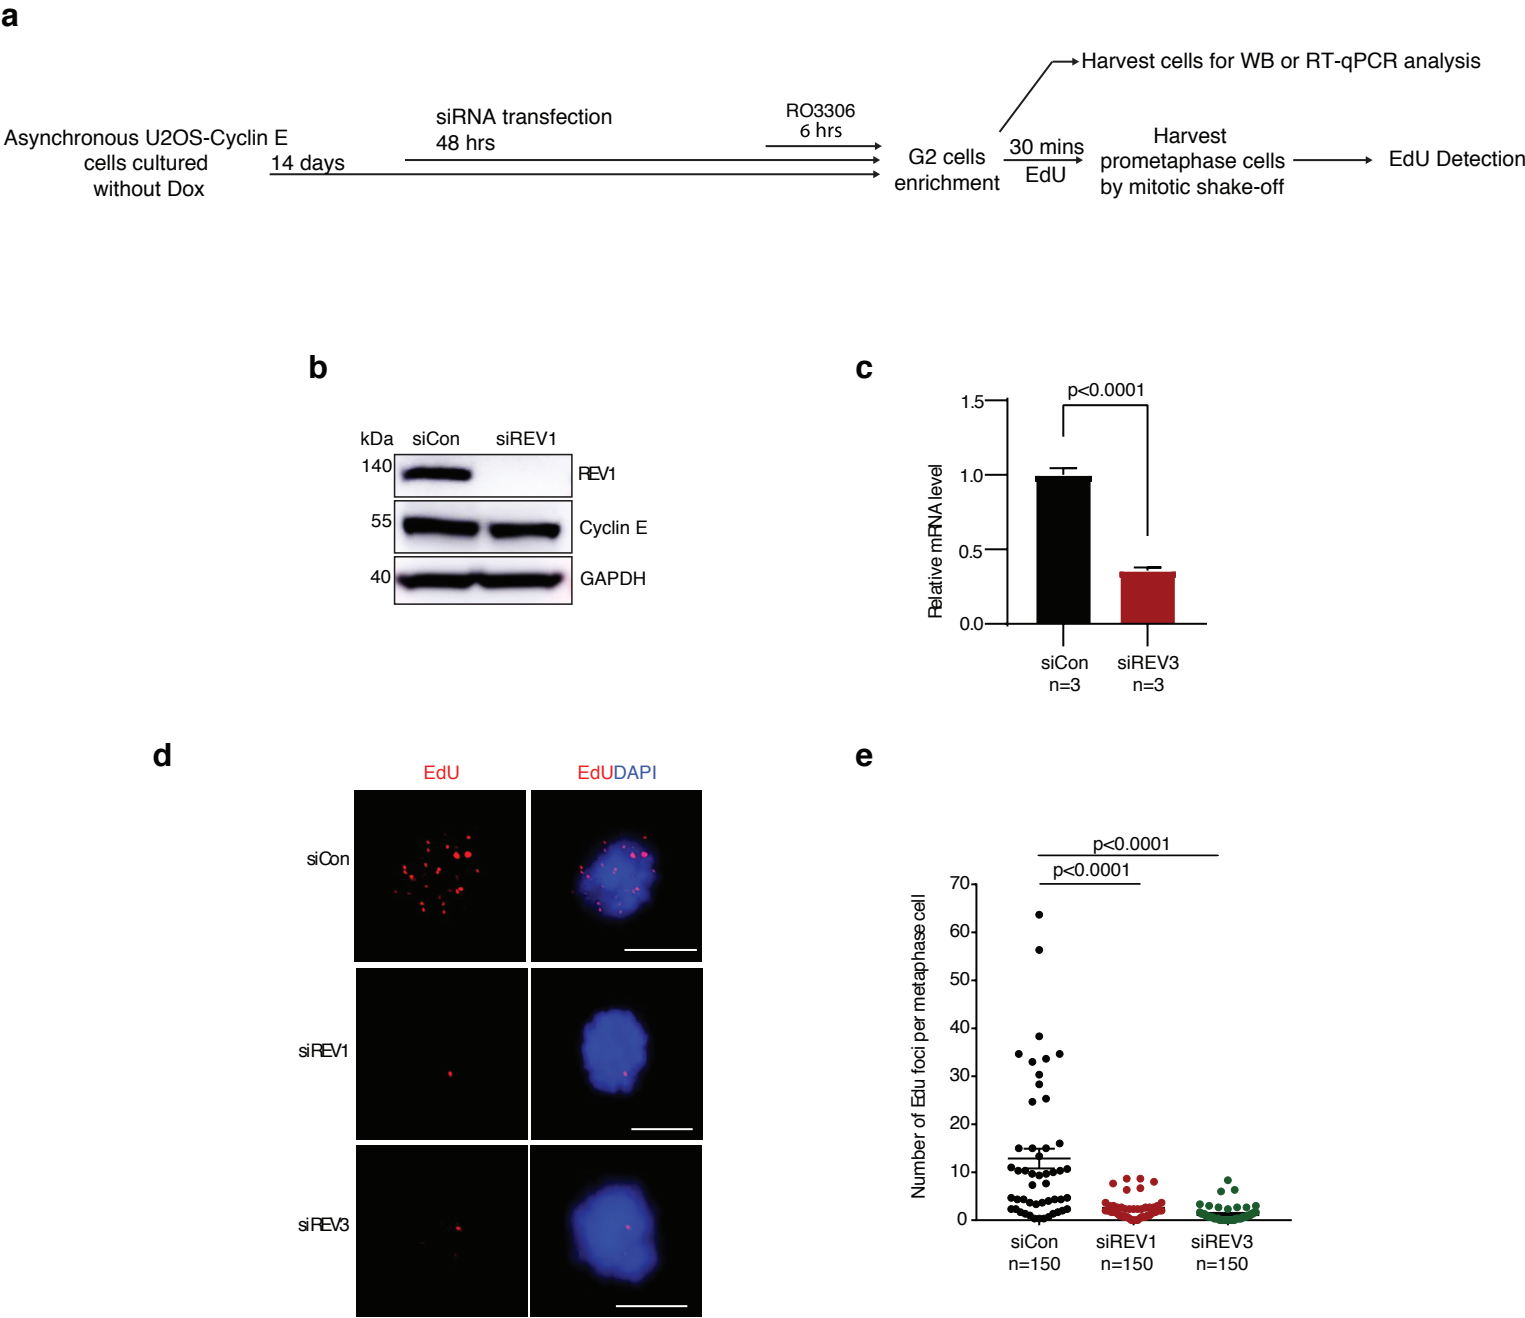

**Supplementary Fig. 11: MiDAS in cells with overexpression of Cyclin E depends on REV1 or REV3.**

**a** Experimental workflow for overexpression of Cyclin E, enrichment of cells at G2/M boundary and harvesting in prometaphase for MiDAS analysis. The expression of Cyclin E was activated by culturing cells without doxycycline for 14 days. Following 6 hours RO3306 treatment, cells were rinsed three times with pre-warmed, drug-free culture medium within 5 minutes, and then incubated with fresh media with EdU before MiDAS analysis. **b** Western blot analysis of REV1 and Cyclin E. GAPDH was used as a loading control. **c** Quantification of REV3 mRNA using RT-qPCRs. The RT-qPCR values were normalized against a region of the GAPDH gene for each sample. Data of each bar are means of independent experiments. Error bars represent SEM. P values were calculated using a two-tailed Student's t-test (n=3 biological replicates). Representative images (**d**) and quantification (**e**) of MiDAS foci (labeled with EdU; red) in prometaphase cells treated as shown in panel a. DNA was stained with DAPI (blue). Each data point in chart e is means of three independent experiments and plotted with Prism (n= number of cells analyzed in each condition in three experiments). Error bars represent SEM. P values were calculated using a two-tailed non-parametric Mann–Whitney test. Scale bars, 10  $\mu$ m. Hr, hour; min, minute.

Supplementary Fig. 12

Replication stress in S phase

a. Stalled forks (Late S - G2 phase)

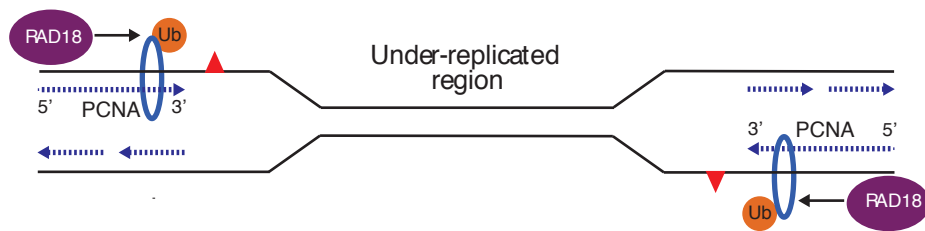

b. Recruitment of REV1 and REV3 (G2 phase - mitosis)

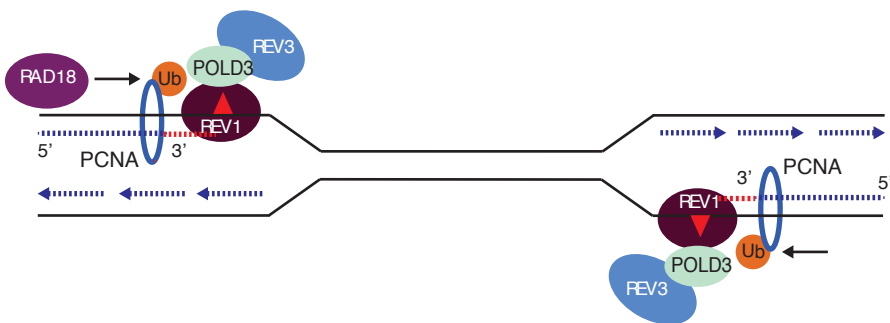

c. BIR (mitosis)

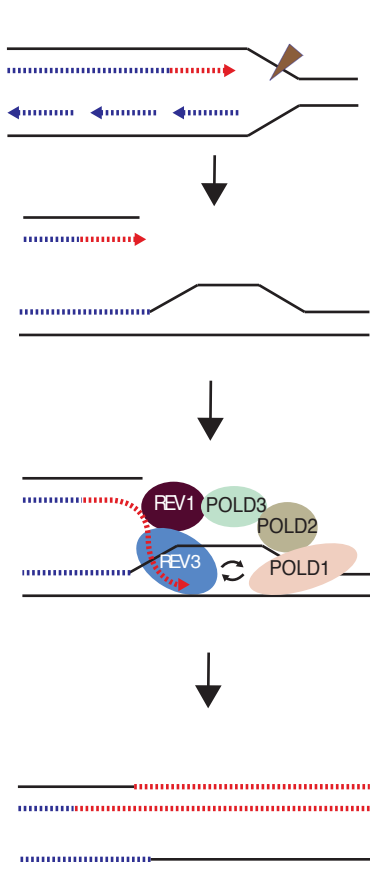

d. SFC (mitosis)

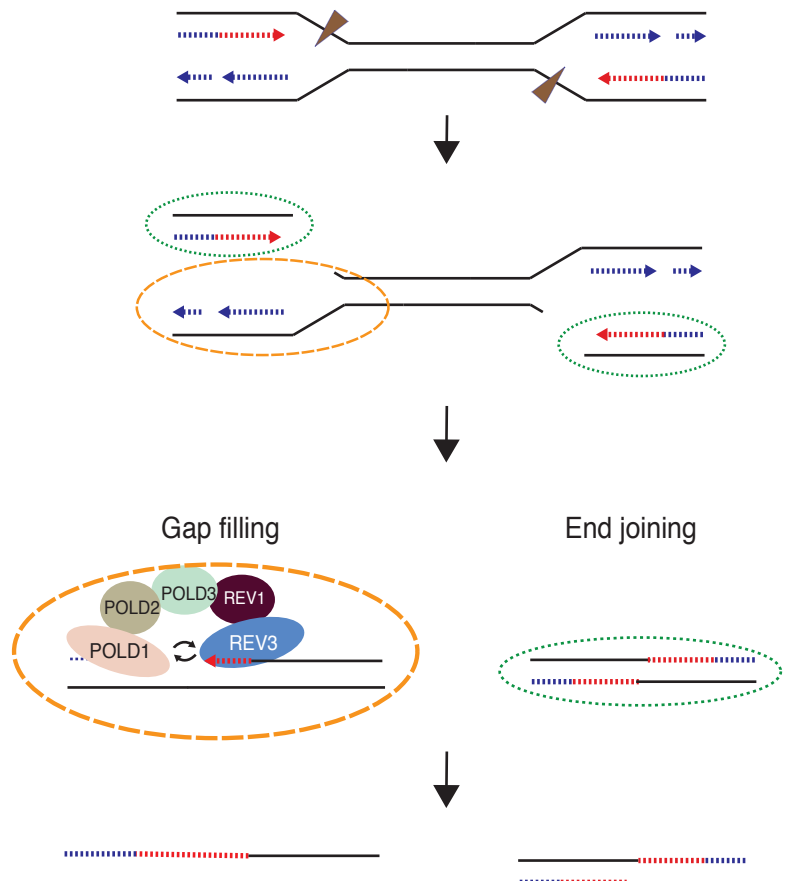

## **Supplementary Fig. 12: Proposed models for how TLS polymerases promote MiDAS.**

**a** Following exposure to RS in S-phase, replication forks can become arrested or disrupted. This would activate a DNA damage response, leading to the monoubiquitylation of PCNA by RAD18. Black solid lines represent the parental DNA strands, while the nascent leading and lagging strands are shown by blue dotted lines. **b** Monoubiquitylated PCNA can recruit REV1, which might then act as a deoxycytidyl transferase and/or a scaffold protein for recruitment of other repair factors. Recruitment of REV3 and POLD3 by REV1 would permit the extension of the nascent DNA (red dotted lines). If replication of the locus were still incomplete when the cell entered mitosis, at least two strategies might be employed to rapidly process the stalled replication forks and conduct 'unscheduled' DNA synthesis (MiDAS) to finish locus duplication. **c** In the 'break-induced replication' model (BIR), the leading strand template would be cut by an SLX4-associated SSE (e.g. MUS81-EME1) (brown arrow) to permit D-loop formation via the invasion of the adjacent intact duplex. DNA synthesis from the invaded strand (now the nascent leading strand) might be initiated by Pol  $\xi$  and then extended by Pol  $\delta$ , following a POLD3-mediated polymerase switch. This switch would facilitate the development of more extensive and processive DNA synthesis. **d** In the previously proposed 'symmetric fork cleavage' model (SFC)<sup>1</sup>, two converging replication forks are each cleaved on the leading strand template by an SLX4-associated SSE (brown arrows). The two broken ends (encircled by green dotted lines) could be ligated by an end joining pathway, while the intact strand (encircled by orange dotted lines; using the left side as an example) could be repaired by REV1/REV3-mediated gap filling that would require Pol  $\delta$  if the tract of DNA synthesis was extensive (again mediated by a POLD3-dependent polymerase switch). In (**c**) and (**d**), red dotted lines indicate new DNA synthesis catalyzed by Pol  $\xi$  and/or Pol  $\delta$  in mitosis, and the blue dotted lines indicate DNA synthesis that had occurred prior to mitosis. Solid black lines denote parental DNA strands.

### **Reference**

1. Wu, R.A., Pellman, D.S. & Walter, J.C. The Ubiquitin Ligase TRAP: Double-Edged Sword at the Replisome. *Trends Cell Biol* **31**, 75-85 (2021).

**REAGENT or RESOURCE**

| <b>Antibodies</b>                                                                         | <b>SOURCE</b>             | <b>IDENTIFIER</b>                    | <b>Dilution factors (WB)</b> | <b>Dilution factors (IF)</b> |
|-------------------------------------------------------------------------------------------|---------------------------|--------------------------------------|------------------------------|------------------------------|
| Mouse anti-FANCD2                                                                         | Santa Cruz                | Cat#sc-20022, RRID: AB_2278211       | /                            | 1/200                        |
| Rabbit anti-FANCD2                                                                        | Novus                     | Cat#NB100-182, RRID: AB_1108498      | /                            | 1/400                        |
| Mouse anti-53BP1(6B3E10)                                                                  | Santa Cruz                | Cat#sc-517281, RRID:AB_2921289       | /                            | 1/100                        |
| Mouse anti-Human DNA pol delta cat (A-9)                                                  | Santa Cruz                | Cat# sc-17776, RRID:AB_675487        | 1/200                        | 1/100                        |
| Rabbit anti-POLD1                                                                         | Bethyl                    | Cat# A304-005A, RRID:AB_2620353      | 1/1000                       | /                            |
| Rabbit anti-POLD1 [EPR15118]                                                              | Abcam                     | Cat#ab186407, RRID:AB_2921290        | 1/1000                       | /                            |
| Rabbit anti-RPA                                                                           | Made in-house             | PMID: 32075739                       | /                            | 1/1000                       |
| Rabbit anti-flag                                                                          | Sigma-Aldrich             | Cat# F7425, RRID:AB_439687           | 1/1000                       | /                            |
| Mouse anti-REV1 (A-11)                                                                    | Santa Cruz                | Cat# sc-393022, RRID:AB_2885169      | 1/200                        | 1/100                        |
| Mouse anti-Actin                                                                          | Sigma-Aldrich             | Cat# A3853, RRID:AB_262137           | 1/1000                       | /                            |
| Mouse anti- $\alpha$ -Tubulin                                                             | Sigma-Aldrich             | Cat# T9026, RRID:AB_477593           | 1/1000                       | /                            |
| Rabbit anti-GAPDH                                                                         | Sigma-Aldrich             | Cat#PLA0125, RRID:AB_2910561         | 1/1000                       | /                            |
| Mouse anti-POL H (B-7)                                                                    | Santa Cruz                | Cat# sc-17770, RRID:AB_2167007       | 1/200                        | /                            |
| Mouse anti-PCNA(PC10)                                                                     | Santa Cruz                | Cat# sc-56, RRID:AB_628110           | 1/200                        | 1/100                        |
| Rabbit anti-Ubiquityl-PCNA (Lys164) (D5C7P)                                               | Cell Signaling Technology | Cat# 13439, RRID:AB_2798219          | 1/1000                       | /                            |
| Mouse anti-Histone H3                                                                     | Abcam                     | Cat# ab1791, RRID:AB_302613          | 1/1000                       | /                            |
| Rabbit anti-Histone H3,phospho (Ser10)                                                    | Abcam                     | Cat# ab5176, RRID:AB_304763          | 1/1000                       | 1/1000                       |
| Rabbit anti-gammaH2AX                                                                     | ThermoFisher Scientific   | Catalog # MA5-33062, RRID:AB_2810155 | 1/1000                       | 1/1000                       |
| Rabbit anti-RAD18                                                                         | Bethyl                    | Cat# A301-340A, RRID:AB_937974       | 1/1000                       | /                            |
| Mouse anti-Cdt2 (B-8)                                                                     | Santa Cruz                | Cat# sc-166735, RRID:AB_2261795      | 1/200                        | /                            |
| Mouse anti-MAD2B / Rev7                                                                   | BD Biosciences            | Cat# 612266, RRID:AB_399583          | 1/1000                       | /                            |
| Mouse anti-Human POLD3                                                                    | Abnova                    | Cat# H00010714-M01, RRID:AB_606803   | 1/1000                       | /                            |
| Guinea pig anti-PICH                                                                      | Made in-house             | PMID: 26633632                       | /                            | 1/400                        |
| Rabbit anti-Cyclin E                                                                      | Abcam                     | Cat# ab33911, RRID:AB_731787         | 1/1000                       | /                            |
| Anti-mouse IgG, HRP-linked Antibody                                                       | Sigma-Aldrich             | Cat# A4416, RRID:AB_258167           | 1/3000                       | /                            |
| Anti-rabbit IgG, HRP-linked Antibody                                                      | Sigma-Aldrich             | Cat# A6667, RRID:AB_258307           | 1/3000                       | /                            |
| Goat anti-Mouse IgG (H+L) Highly Cross-Adsorbed Secondary Antibody, Alexa Fluor 488       | ThermoFisher Scientific   | Cat# A-11029, RRID:AB_2534088        | /                            | 1/500                        |
| Goat anti-Rabbit IgG (H+L) Highly Cross-adsorbed Antibody, Alexa Fluor 568 Conjugated     | ThermoFisher Scientific   | Cat# A-11036, RRID:AB_10563566       | /                            | 1/500                        |
| Goat anti-Rabbit IgG (H+L) Highly Cross-Adsorbed Secondary Antibody, Alexa Fluor Plus 488 | ThermoFisher Scientific   | Cat# A32731, RRID:AB_2633280         | /                            | 1/500                        |
| Goat anti-Rabbit IgG (H+L) Cross-Adsorbed Secondary Antibody, Alexa Fluor 568             | ThermoFisher Scientific   | Cat# A-11011, RRID:AB_143157         | /                            | 1/500                        |
| Goat anti-Guinea Pig IgG (H+L) Highly Cross-Adsorbed Secondary Antibody, Alexa Fluor 568  | ThermoFisher Scientific   | Cat# A-11075, RRID:AB_2534119        | /                            | 1/500                        |
| Goat anti-Guinea Pig IgG (H+L) Highly Cross-Adsorbed Secondary Antibody, Alexa Fluor 488  | ThermoFisher Scientific   | Cat# A-11073, RRID:AB_2534117        | /                            | 1/500                        |

| <b>Chemicals, Peptides, and Recombinant Proteins</b>                | <b>SOURCE</b>                                | <b>IDENTIFIER</b>  |
|---------------------------------------------------------------------|----------------------------------------------|--------------------|
| 5-Ph-IAA                                                            | BioAcademia                                  | Cat#30-003         |
| Aphidicolin                                                         | Sigma-Aldrich                                | Cat#A0781          |
| BamH I                                                              | New England Biolabs                          | Cat#R3136S         |
| Benzonase® Nuclease                                                 | Sigma-Aldrich                                | Cat#E1014          |
| BSA, Bovine Serum Albumin                                           | Sigma-Aldrich                                | Cat#A7906          |
| Cell Extraction Buffer                                              | ThermoFisher Scientific                      | Cat#FNN0011        |
| Cisplatin                                                           | Sigma-Aldrich                                | Cat#232120         |
| cOmplete™ ULTRA Tablets, Mini, EASYpack Protease Inhibitor Cocktail | Sigma-Aldrich                                | Cat#05892970001    |
| Doxycycline hyclate                                                 | Sigma-Aldrich                                | Cat#D9891          |
| FuGENE® HD Transfection Reagent                                     | Promega                                      | Cat#E2311          |
| Geneticin™ Selective Antibiotic (G418 Sulfate)                      | ThermoFisher Scientific                      | Cat#10131027       |
| Hygromycin B                                                        | ThermoFisher Scientific                      | Cat#10687010       |
| Kpn I                                                               | New England Biolabs                          | Cat#R3142S         |
| Lipofectamine™ RNAiMAX Transfection Reagent                         | ThermoFisher Scientific                      | Cat#13778-150      |
| Opti-MEM® I Reduced Serum Medium, no phenol red                     | ThermoFisher Scientific                      | Cat#11058021       |
| PhosSTOP™                                                           | Sigma-Aldrich                                | Cat#4906837001     |
| PMSF, Phenylmethylsulfonyl fluoride                                 | Sigma-Aldrich                                | Cat#10837091001    |
| Puromycin                                                           | ThermoFisher Scientific                      | Cat#A1113802       |
| RIPA Lysis and Extraction Buffer                                    | ThermoFisher Scientific                      | Cat#89900          |
| RO3306                                                              | ApexBio                                      | Cat#A8885          |
| SDS                                                                 | Sigma-Aldrich                                | Cat#151-21-3       |
| T4 DNA Ligase                                                       | New England Biolabs                          | Cat#M0202S         |
| Triton X-100                                                        | Sigma-Aldrich                                | Cat#T8787          |
|                                                                     |                                              |                    |
| <b>Critical Commercial Assays</b>                                   | <b>SOURCE</b>                                | <b>IDENTIFIER</b>  |
| MycAlert™ Mycoplasma Detection Kit                                  | Lonza                                        | Cat#LT07-318       |
| illustra™ RNAspin Mini RNA Isolation Kit                            | Sigma-Aldrich                                | Cat#GE25-0500-71   |
| Click-iT® EdU Alexa Fluor® 594 Imaging Kit                          | ThermoFisher Scientific                      | Cat#C10339         |
| QuikChange II XL Site-Directed Mutagenesis Kit                      | Agilent Technologies                         | Cat#200522         |
| SuperScript™ III Reverse Transcriptase                              | ThermoFisher Scientific                      | Cat#18080044       |
|                                                                     |                                              |                    |
| <b>Experimental Models: Cell Lines</b>                              | <b>SOURCE</b>                                | <b>IDENTIFIER</b>  |
| U2OS                                                                | ATCC                                         | ATCC® HTB-96       |
| Flp-In T-REx U2OS                                                   | Mailand group, Univ. of Copenhagen           | /                  |
| Flp-In T-REx U2OS, BirA*-POLD3 WT                                   | Made in-house                                | /                  |
| Flp-In T-REx U2OS, BirA*-POLD3 (F238F239/A238A239)                  | Made in-house                                | /                  |
| HeLa                                                                | ATCC                                         | ATCC® CCL-2        |
| HCT116                                                              | ATCC                                         | ATCC® CCL-247      |
| HCT116 cells expressing OsTIR1(F74G) and POLD1-mAID-Clover          | Made in-house                                | /                  |
| U2OS-Cyclin E                                                       | Halazonetis group, Univ. Of Geneva           | PMID: 29466339     |
| U2OS-StrepHA-PCNA(WT)                                               | Mailand group, Univ. of Copenhagen           | PMID: 26711499     |
| U2OS-StrepHA-PCNA(K164R )                                           | Mailand group, Univ. of Copenhagen           | PMID: 26711499     |
| Isogenic pair of U2OS cell lines with REV7 or REV7-/-               | D'Andrea group , Harvard Medical School, USA | PMID: 31915374     |
|                                                                     |                                              |                    |
| <b>Oligonucleotides</b>                                             | <b>SOURCE</b>                                | <b>IDENTIFIER</b>  |
| <b>SiRNAs</b>                                                       |                                              |                    |
| siControl: ON-TARGETplus Non-targeting Pool                         | Dharmacon                                    | Cat#D-001810-10-20 |
| siREV1-2: 5'-CAGCGCAUCUGUGCCAAGAATT-3'                              | synthesized by Sigma-Aldrich                 | PMID: 21926160     |
| siREV1-4: 5'-AUCGGUGGAAUCGGUUUGGAATT-3'                             | synthesized by Sigma-Aldrich                 | PMID: 21926160     |
| siREV1-B: 5'-AAGCAUCAAAGCUGGACGACUTT-3'                             | synthesized by Sigma-Aldrich                 | PMID: 20028736     |

|                                                                                      |                                    |                    |
|--------------------------------------------------------------------------------------|------------------------------------|--------------------|
| siREV7-1: 5'-<br>GUGGAAGAGCGCGCUCAAUAATT-3'                                          | synthesized by Sigma-Aldrich       | PMID: 21926160     |
| siREV7-3: 5'-<br>AAGAUGCAGCUUUAACGUGGAATT-3'                                         | synthesized by Sigma-Aldrich       | PMID: 21926160     |
| siREV3-1: 5'-<br>CGGGAUGUAGUCAACUGCAATT-3'                                           | synthesized by Sigma-Aldrich       | PMID: 21926160     |
| siREV3-2: 5'-<br>CCCACUGGAUUAAUUGCACAATT-3'                                          | synthesized by Sigma-Aldrich       | PMID: 21926160     |
| siREV3 3'UTR (Sequence starting<br>position: 10016)                                  | Sigma-Aldrich                      | /                  |
| siPOLH: 5'-CTGGTTGTGAGCATTCTGTGA -3'                                                 | synthesized by Sigma-Aldrich       | PMID: 20028736     |
| siRAD18-3: 5'-<br>GAGCAUGGAUUUAUCUAUUAATT-3'                                         | synthesized by Sigma-Aldrich       | PMID: 21926160     |
| siPCNA 3'UTR: 5'-<br>AGAAUAAAGUCCAAAGUCATT-3'                                        | synthesized by Sigma-Aldrich       | PMID: 29051491     |
| siUBC9-1: 5'-<br>CAGGUGGAACUAAGGGACUUUTT-3'                                          | synthesized by Sigma-Aldrich       | PMID: 22366399     |
| siUBC9-2: 5'-<br>AAGUAGCUGUCCCAACAAGATT-3'                                           | synthesized by Sigma-Aldrich       | PMID: 22366399     |
| siCDT2-1: 5'-<br>GAUUUAUACUGCUUAUCGATT-3'                                            | synthesized by Sigma-Aldrich       | PMID: 18794347     |
| siCDT2-2: 5'-AUACAAGAGUGACUCUAUATT-<br>3'                                            | synthesized by Sigma-Aldrich       | PMID: 18794347     |
| <b>Primers</b>                                                                       |                                    |                    |
| REV3L Forward: 5'-<br>TGAGTTCAAATTTGGCTGTACCT-3'                                     | synthesized by Sigma-Aldrich       | PMID: 22028621     |
| REV3L Reverse: 5'-<br>TCTAGTCTTCAAAATTTCTTCAAGCA-3'                                  | synthesized by Sigma-Aldrich       | PMID: 22028621     |
| GAPDH Forward: 5'-<br>AAGGTCGGAGTCAACGGATTGGT-3'                                     | synthesized by Sigma-Aldrich       | PMID: 20028736     |
| GAPDH Reverse: 5'-<br>AGTGATGGCATGGACTGTGGTCAT-3'                                    | synthesized by Sigma-Aldrich       | PMID: 20028736     |
| POLD3.KpnIF: 5'-<br>TAAGGTACCATGGCGGACCAG-3'                                         | synthesized by Sigma-Aldrich       | designed -in-house |
| POLD3.BamHI: 5'-<br>CTAGGATCCTTATTTCTCTGGAAG-3'                                      | synthesized by Sigma-Aldrich       | designed -in-house |
| POLD3 (F238A/F239A) F: 5'-<br>GAATATGATGAGCAACGCTGCTGGAAAAGCT<br>GCTATG-3'           | synthesized by Sigma-Aldrich       | designed -in-house |
| POLD3 (F238A/F239A) R: 5'-<br>CATAGCAGCTTTTCCAGCAGCGTTGCTCATCA<br>TATTC-3'           | synthesized by Sigma-Aldrich       | designed -in-house |
| REV3L-ATA-F : 5'-<br>GCTAGGGTTGTATATGGCGcTACTGCCAGTA<br>TGTTTGTGCTACTG-3'            | synthesized by Sigma-Aldrich       | PMID: 27481099     |
| REV3L-ATA-R: 5'-<br>CAGTAGCACAAACATACTGGCAGTA <sub>g</sub> CGCCA<br>TATACAACCTAGC-3' | synthesized by Sigma-Aldrich       | PMID: 27481099     |
| <b>Recombinant DNA</b>                                                               |                                    |                    |
| pcDNA5_FRT-TO_HA-BirA*                                                               | Mailand group, Univ. of Copenhagen | /                  |
| pOG44                                                                                | ThermoFisher Scientific            | Cat#V600520        |
| pCDNA5_FRT-TO_HA-BirA*-POLD3 WT                                                      | Made in-house                      | /                  |
| pCDNA5_FRT-TO_HA-BirA*-POLD3<br>(F238F239/A238A239)                                  | Made in-house                      | /                  |
| pEF6/V5-REV3-3xFLAG                                                                  | Canman group, Univ. of Michigan    | PMID: 21926160     |
| pEF6/V5-REV3-3xFLAG-ATD/ATA                                                          | Made in-house                      | /                  |
| <b>Software and Algorithms</b>                                                       |                                    |                    |
| ImageJ                                                                               | NIH                                |                    |
| Prism 9.0.0                                                                          | GraphPad                           |                    |
| Olympus cellSens Software                                                            | Olympus                            |                    |
| TIBCO Spotfire                                                                       | PerkinElmer                        |                    |
| FlowJO                                                                               | BD Biosciences                     |                    |

## Gating strategy used in flow cytometry analysis (Methods)

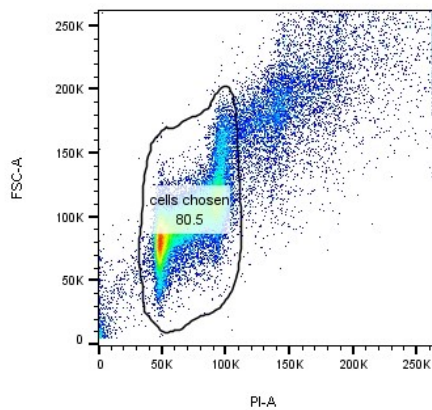

B1+DOX14DAYS\_Tube\_001\_004.fcs  
Ungated  
50000

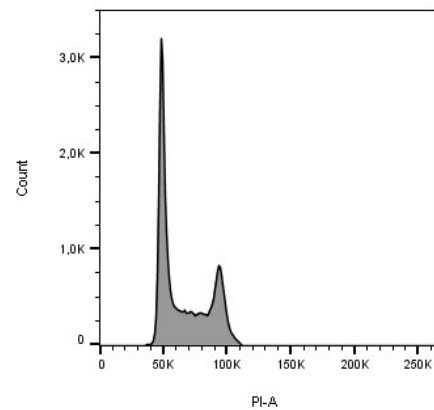

B1+DOX14DAYS\_Tube\_001\_004.fcs  
cells chosen  
40269

Above left, a representative chart of untreated U2OS gated on a forward scatter (FSC-A) / total PI fluorescence (PI-A) plot. In this chart, the black circle indicated the boundary of gating single cells. Right, singlets (80-90%) were represented as cell count / PI fluorescence (PI-A) in a histogram. 50,000 cells were analysed in each condition.
